# Supplementary material for: Mechanism of life-long maintenance of neuron identity despite molecular fluctuations
Source: eLife journal article supplement (doi:10.7554/elife.66955), 2021-12-15
Supplement: fig2-data1 [file Figure 2-Source data.xlsx]

## Sheet: Fig 2B
time che-1	che-1		time gcy-22	gcy-22			smFISH data on embryo's
300	0		300	0			che-1 in Cy5
300	0		360	0			gcy-22 in Alexa594
360	29		360	0			Quantified in N2 animals
360	31		430	3
360	31		430	9
360	26		430	5
360	15		430	1
360	18		490	12
360	19		490	13
360	22		490	10
360	33		550	15
360	31		550	11
360	27		550	16
360	24		550	13
360	27		550	13
360	35		550	9
430	9		550	7
430	6		550	8
430	9		610	20
430	11		610	22
430	9		610	18
430	3		610	26
430	6		610	19
430	5		610	24
430	15		610	21
430	10		610	19
430	16		610	23
490	4
490	10
490	5
490	3
490	8
490	10
490	4
490	7
550	7
550	5
550	3
550	6
550	9
550	4
550	8
550	4
550	8
550	3
550	10
550	6
550	1
550	4
550	9
550	8
550	12
550	5
550	11
610	10
610	9
610	3
610	3
610	2
610	5
610	5
610	7
610	3
610	8
610	6
610	10
610	7
610	5
610	7
610	11
610	7
610	5

## Sheet: Fig 2F
animal	ASEL/ASER	Intensity	Background	Volume	age
w1	ASEL	1519	62	3	L1/L2
w2	ASER	1690	101	3.8	L1/L2
w4	ASER	1234	60	4.2	L1/L2
w6	ASEL	1529	148	2.9	L1/L2
w8	ASEL	1414	102	3	L1/L2
w9	ASER	1719	118	3.9	L1/L2
w10	ASER	1445	136	3.6	L1/L2
w11	ASER	1879	62	3.4	L1/L2
w12	ASER	1273	96	5.2	L3/L4
w7	ASEL	1177	80	3	L3/L4
w14	ASER	1427	80	3.6	L1/L2
w3	ASER	1360	78	9	YA
w100	ASER	915		6.4	YA
w13	ASEL	803	174	5.1	YA
w15	ASEL	913	57	4.5	L3/L4
w16	ASEL	726	37	5.7	YA
w17	ASER	1077	107	7.5	YA
w18	ASEL	980	48	3.7	L3/L4
w19	ASEL	815	64	6.8	YA
w20	ASER	968	46	5.2	L3/L4
w21	ASER	1366	95	6.2	YA
w23	ASER	1483	82	5.2	L3/L4
w24	ASER	1807	72	2.7	L1/L2
w25	ASER	1958	103	3.1	L1/L2
w26	ASEL	1282	82	5.2	L3/L4
w27	ASEL	1189	74	4.4	L3/L4
w28	ASEL	1521	151	2.8	L1/L2
w29	ASER	1475	74	3.5	L1/L2
w30	ASEL	1374	96	2.6	L1/L2
w31	ASEL	1429	95	3.4	L3/L4
