# Supplementary material for: Mechanism of life-long maintenance of neuron identity despite molecular fluctuations
Source: eLife journal article supplement (doi:10.7554/elife.66955), 2021-12-15
Supplement: fig2-data1 [file Figure 2DE-Source data_smFISH_data_larvea_N2.xlsx]

## Sheet: che1_asel_length
length	ASEL		Combined smFISH data on larvea
235	4		che-1 in Cy5
237	8
244	2
248	1
251	2
259	2
265	5
282	2
287	3
290	6
303	5
306	1
306	3
316	4
319	5
321	3
330	3
331	5
336	8
345	4
354	5
361	7
370	3
382	5
390	3
392	3
398	8
400	4
414	6
466	3
492	4
513	6
521	8
533	3
543	5
556	6
560	4
565	13
569	4
573	7
576	15
588	10
592	2
600	7
603	3
619	7
684	9
690	3
711	5
720	9
723	6
741	4
742	7
761	3
772	4
780	8
793	5
877	11
900	10

## Sheet: che1_aser_length
length	ASER		Combined smFISH data on larvea
235	3		che-1 in Cy5
244	6
248	8
251	6
258	6
259	3
261	5
265	12
282	11
283	4
287	8
303	3
306	3
306	3
316	10
319	3
321	10
327	1
331	6
345	2
354	10
361	5
370	12
390	8
392	9
400	7
416	7
493	12
529	6
532	9
541	10
545	9
559	14
559	6
565	4
574	9
575	15
578	12
587	18
590	9
597	4
603	13
616	13
619	2
627	7
630	16
692	16
693	5
693	1
704	37
710	19
711	3
718	21
720	4
723	4
761	7
763	10
765	2
772	7
793	8
827	6
828	19
837	4
877	15

## Sheet: combined_gcy-14_length
length	ASEL		Combined smFISH data on larvea
263	13		gcy-14 in Alexa594
284	13
302	13
314	12
317	13
335	17
339	12
342	17
345	15
348	15
354	17
354	17
357	9
360	17
363	23
372	19
374	19
375	9
375	19
375	12
381	20
384	23
387	17
390	16
393	16
427	20
442	23
452	20
473	16
529	22
544	17
547	25
548	22
553	20
575	19
590
617	24
625	28
629	20
641	22
644	30
647	23
653	17
657	18
675	21
678	18
687	22
693	25
693	32
694	25
696	21
706	17
711	22
719	19
726	27
728	17
729	21
738	23
738	28
768	29
771	19
777	20
781	26
800	24
805	25
808	22
810	31
826	21
832	26

## Sheet: combined_gcy-22_length
length	ASER		Combined smFISH data on larvea
231	17		gcy-22 in Alexa594
242	17
247	27
260	24
264	26
267	22
270	19
276	26
287	27
298	25
316	25
317	31
324	16
325	27
327	22
327	26
329	22
330	28
331	27
332	21
332	25
341	20
341	33
349	32
356	25
358	33
367	28
370	24
380	27
397	27
403	34
410	22
420	31
465	34
465	28
482	26
492	24
501	23
503	29
523	34
525	26
532	30
539	31
547	31
547	34
569	22
589	34
594	29
607	24
608	37
610	25
646	24
665	22
674	25
684	26
690	30
697	24
701	29
704	26
705	25
708	26
709	27
709	33
710	33
712	27
718	25
721	24
727	33
727	32
730	25
730	32
732	31
733	37
738	28
745	26
752	28
754	24
758	36
761	28
762	35
764	25
765	32
768	31
771	26
778	25
797	24
819	38
827	26
860	27
894	38
908	29
914	30
920	25
935	36
936	35
963	32
978	27
997	29
999	37
1000	38
1005	28
1008	32
1013	23
1019	34
1037	30
1067	26
1068	36
1076	39
1080	34
1082	25
1089	28
1091	33
1099	33
1110	25
1110	38
1130	39
1158	22
1166	23
1185	28

## Sheet: L2_larvea_ASER
del-2 ASER	tax-4 ASER	gcy-22 ASER	tax-2 ASER	che-1 ASER		Combined smFISH data on L1/L2 larvea
12	4	17	3	3
6	1	17	7	6
15	5	27	3	8
8	4	24	3	6
9	1	26	4	6
14	6	22	3	3
11	5	19	2	5
12	5	26	1	12
13	1	27	4	11
9	8	25	3	4
9	5	25	2	8
10	5	31	2	3
13	5	16	2	3
7	5	27	2	3
10	4	22	4	10
16	4	26	6	3
9	3	22	5	10
12	3	28	2	1
12	1	27		6
11	4	21		2
11	1	25		10
4	2	20		5
	4	33		12
	7	32		8
	1	25		9
	4	33		7
	4	28		7
	1	24		12
	4	27
	2	27
	3	34
	3	22
	8	31
	5	34
	4	28
	3	26
	2	24
	7
	1
	3
	5
	4
	1
	3
	5
	2
	3
	4
	2
	9
	5
	5
	3
	1
	5
	3
	3
	5
	4
	8
	5
	8
	6
	6
	8
	5
	10
	17
	3
	5

## Sheet: L2_larvea_ASEL
del-2 ASEL	tax-4 ASEL	gcy-14 ASEL	tax-2 ASEL	che-1 ASEL		Combined smFISH data on L1/L2 larvea
9	7	13	5	1
14	6	13	4	2
13	4	13	4	2
8	6	12	7	5
9	7	13	3	2
10	5	17	5	3
14	9	12	6	6
16	6	17	4	5
5	3	15	10	1
13	8	15	6	3
12	7	17	5	4
14	7	17	4	5
9	5	9	3	3
17	3	17	6	3
15	6	23	5	5
13	3	19	4	8
11	3	19	4	4
9	4	9	7	5
17	3	19	6	7
6	4	12	3	3
8	2	20	5	5
9	9	23	5	3
10	8	17	5	3
13		16		8
14		16		4
12		20		6
10		23		3
14		20		4
8		16
13

## Sheet: che1_all_data
length	ASER	ASEL		Combined smFISH data on larvea in ASER or ASEL
290		6		che-1 in Cy5
330		3
382		5
416	7
258	6
283	4
237		8
336		8
327	1
265	12	5
331	6	5
287	8	3
361	5	7
321	10	3
235	3	4
392	9	3
259	3	2
319	3	5
354	10	5
316	10	4
244	6	2
261	5
345	2	4
303	3	5
306	3	1
400	7	4
306	3	3
390	8	3
370	12	3
282	11	2
251	6	2
248	8	1
398		8
704	37
466		3
565	4	13
545	9
556		6
578	12
603	13
616	13
541	10
630	16
627	7
575	15
559	14
559	6
597	4
532	9
529	6
590	9
493	12
587	18
513		6
492		4
573		7
414		6
569		4
576		15
521		8
588		10
543		5
693	5
828	19
718	21
	7
	16
	4
	5
	5
	6
710	19
574	9
693	1
793	8	5
765	2
877	15	11
720	4	9
	4
692	16
772	7	4
619	2	7
827	6
711	3
837	4
723	4	6
763	10
761	7	3
742		7
690		3
600		7
592		2
560		4
533		3
741		4
900		10
603		3
684		9
711		5
780		8
