# Supplementary material for: Mechanism of life-long maintenance of neuron identity despite molecular fluctuations
Source: eLife journal article supplement (doi:10.7554/elife.66955), 2021-12-15
Supplement: fig2-data1 [file Figure S2-Source data.xlsx]

## Sheet: Fig S2B
	hrs no treatment	hrs EtOH treatment	animals age	chemotaxis index						mean	s.e.m.
che-1::GFP::AID	120	0	120	0.980952	0.932584	0.954023	0.909774			0.944334	0.0151855
	96	24	120	0.932203	0.963636	0.944444	0.826087			0.916593	0.0308542
	72	48	120	1	0.901961	0.969466	0.933333			0.95119	0.0213284
	96	0	96	0.868421	0.956522					0.912471	0.0440503
	24	72	96	0.978723	0.816327	0.946667				0.913906	0.0496594
	120	0	120	0.971014	0.853659					0.912337	0.058678
	24	96	120	0.942029	0.947368	0.862069				0.917155	0.0275863

## Sheet: Fig S2C
	hrs auxin	hrs recovery	chemotaxis index												mean	s.e.m.
che-1::GFP::AID	0	na	0.969697	0.967742	0.969697	0.967742	0.879518	0.917355	0.967213	0.980198	0.972603	1	0.904762	0.960396	0.954744	0.0101289
che-1(p679)	0	na	-0.0625	0.101449	0	0.0518519	-0.0769231	0	0.0909091	0.0454545	0.0377358	0.030303	-0.188406		0.00271589	0.0253865
che-1::GFP::AID	24	0	0.351351	0.388889	0.466667	0.444444									0.412838	0.0262213
che-1::GFP::AID	24	24	0.807229	0.787879	0.815789	0.838384									0.81232	0.0104668
che-1::GFP::AID	24	48	0.846154	0.68254	0.886792	0.824176									0.809915	0.0443952
che-1::GFP::AID	0	na	0.924051	0.948052	0.877551	0.967213	0.914894	0.95122	0.859155	0.975	0.963636	0.907692	0.972222	0.903614	0.930358	0.0111212
che-1(p679)	0	na	-0.011236	0.0535714	-0.0333333	-0.0434783	0.0869565	-0.0909091	0.0612245	-0.162393	0.488889	0.615385	0.4375	-0.0985915	0.108632	0.0743237
che-1::GFP::AID	48	0	0.0169492	-0.0515464	-0.171875	-0.0647482									-0.0678051	0.0390379
che-1::GFP::AID	48	24	0.402985	0.391304	0.62069	0.302326									0.429326	0.0676318
che-1::GFP::AID	48	48	0.529412	0.677419	0.358025	0.4									0.491214	0.0719901
che-1::GFP::AID	0	na	0.927711	0.881188	0.846154	0.753086	0.969231	0.977528	0.972973	0.964912	0.92	0.973684	0.877551	0.945205	0.917435	0.0195936
che-1(p679)	0	na	0.111111	-0.0769231	0.0545455	0.148936	0.0666667	-0.0508475	0.0746269	0.0985915	0.0243902	0.117647	0.1	-0.0222222	0.0538769	0.020567
che-1::GFP::AID	72	0	0.0461538	-0.03125	0.0294118	-0.0666667									-0.00558776	0.0262858
che-1::GFP::AID	72	24	0	-0.148148	-0.219512	0.411765									0.0110261	0.141185
che-1::GFP::AID	72	48	0.19403	0.26	0.0980392	0.0909091									0.160745	0.0405879
che-1::GFP::AID	0	na	0.92	0.973684	0.877551	0.945205	0.86	0.970149	0.972222	0.903614	0.92233	0.891892	0.948718	0.964912	0.92919	0.0113664
che-1(p679)	0	na	0.0243902	0.117647	0.1	-0.0222222	-0.101449	0.030303	0.4375	-0.0985915	0.179487	0.25	-0.0689655	-0.027027	0.0684227	0.0461625
che-1::GFP::AID	96	0	0.0322581	-0.0545455	0.0666667	-0.0410959									0.000820847	0.0290781
che-1::GFP::AID	96	24	0	-0.320755	-0.15942	-0.297297									-0.194368	0.073919
che-1::GFP::AID	96	48	0.121951	0.0588235	-0.192308	0.0645161									0.0132458	0.0699852

## Sheet: Fig S2D
	hrs after hatching	chemotaxis index												mean	s.e.m.
che-1::GFP::AID	48	0.969697	0.967742	0.967213	0.980198									0.971213	0.00304243
	72	0.924051	0.948052	0.859155	0.975									0.926564	0.0247623
	96	0.927711	0.881188	0.972973	0.964912									0.936696	0.0209643
	120	0.980952	0.932584	0.954023	0.909774									0.944334	0.0151855
	144	0.849462	0.939394	0.924242	0.90411									0.904302	0.0196564
	168	0.926829	0.901235	0.882353	0.827338									0.884439	0.0211027

## Sheet: Fig S2E
	hrs auxin	hrs recovery	animals age	chemotaxis index					mean	s.e.m.
che-1(p679)	na	na	120	0.0123457	0.324675	0.0526316	-0.0666667		0.0807465	0.0850005
che-1::GFP::AID	0	na	120	0.980952	0.932584	0.954023	0.909774		0.944334	0.0151855
che-1::GFP::AID	48	0	120	0.0588235	0.0227273	0.358025	0.358974	0.0149254	0.162695	0.0802793
che-1(p679)	na	na	144	0	0.0526316	0.0344828	0.0540541		0.0352921	0.0125793
che-1::GFP::AID	0	na	144	0.849462	0.939394	0.924242	0.90411		0.904302	0.0196564
che-1::GFP::AID	48	24	144	0.474747	0.419355	0.322314	0.447368	0.431579	0.419073	0.0259028
che-1(p679)	na	na	168	0.0769231	0.148148	0.288136	0.0877193		0.150232	0.0485659
che-1::GFP::AID	0	na	168	0.926829	0.901235	0.882353	0.827338		0.884439	0.0211027
che-1::GFP::AID	48	48	168	0.454545	0.236842	0.547945	0.775281	0.737374	0.550397	0.0982454
