# Supplementary material for: Mechanism of life-long maintenance of neuron identity despite molecular fluctuations
Source: eLife journal article supplement (doi:10.7554/elife.66955), 2021-12-15
Supplement: fig2-data1 [file Figure S3C-Source data_plot_che1_on_or_without_etoh.xlsx]

## Sheet: plot_che1_on_etoh
che_1	ASE		che-1::GFP::AID
9	ASER		on ethonal
12	ASER
16	ASER
17	ASER
13	ASER
8	ASER
11	ASER
17	ASER
12	ASER
12	ASER
11	ASER
10	ASER
12	ASER
13	ASER
11	ASER
16	ASER
8	ASER
15	ASER
12	ASER
7	ASER
15	ASER
17	ASER
8	ASER
9	ASER
11	ASER
9	ASEL
6	ASEL
8	ASEL
13	ASEL
8	ASEL
9	ASEL
6	ASEL
7	ASEL
7	ASEL
6	ASEL
7	ASEL
7	ASEL
8	ASEL
8	ASEL
6	ASEL
9	ASEL
10	ASEL
5	ASEL
5	ASEL
3	ASEL
9	ASEL
5	ASEL
7	ASEL
10	ASEL
8	ASEL

## Sheet: plot_che1_control
che_1			che-1::GFP::AID
11	ASER		control ethanol experiment
10	ASER
13	ASER
9	ASER
14	ASER
15	ASER
10	ASER
7	ASER
7	ASER
12	ASER
13	ASER
13	ASER
13	ASER
16	ASER
18	ASER
11	ASER
17	ASER
9	ASER
6	ASER
11	ASER
14	ASER
9	ASER
13	ASER
11	ASER
5	ASEL
3	ASEL
9	ASEL
8	ASEL
7	ASEL
7	ASEL
5	ASEL
6	ASEL
3	ASEL
8	ASEL
10	ASEL
6	ASEL
6	ASEL
12	ASEL
5	ASEL
5	ASEL
10	ASEL
6	ASEL
4	ASEL
11	ASEL
7	ASEL
7	ASEL
6	ASEL

## Sheet: plot_all
che_1	ASE	condition		combined two sheets
9	ASER	on
12	ASER	on
16	ASER	on
17	ASER	on
13	ASER	on
8	ASER	on
11	ASER	on
17	ASER	on
12	ASER	on
12	ASER	on
11	ASER	on
10	ASER	on
12	ASER	on
13	ASER	on
11	ASER	on
16	ASER	on
8	ASER	on
15	ASER	on
12	ASER	on
7	ASER	on
15	ASER	on
17	ASER	on
8	ASER	on
9	ASER	on
11	ASER	on
9	ASEL	on
6	ASEL	on
8	ASEL	on
13	ASEL	on
8	ASEL	on
9	ASEL	on
6	ASEL	on
7	ASEL	on
7	ASEL	on
6	ASEL	on
7	ASEL	on
7	ASEL	on
8	ASEL	on
8	ASEL	on
6	ASEL	on
9	ASEL	on
10	ASEL	on
5	ASEL	on
5	ASEL	on
3	ASEL	on
9	ASEL	on
5	ASEL	on
7	ASEL	on
10	ASEL	on
8	ASEL	on
11	ASER	control
10	ASER	control
13	ASER	control
9	ASER	control
14	ASER	control
15	ASER	control
10	ASER	control
7	ASER	control
7	ASER	control
12	ASER	control
13	ASER	control
13	ASER	control
13	ASER	control
16	ASER	control
18	ASER	control
11	ASER	control
17	ASER	control
9	ASER	control
6	ASER	control
11	ASER	control
14	ASER	control
9	ASER	control
13	ASER	control
11	ASER	control
5	ASEL	control
3	ASEL	control
9	ASEL	control
8	ASEL	control
7	ASEL	control
7	ASEL	control
5	ASEL	control
6	ASEL	control
3	ASEL	control
8	ASEL	control
10	ASEL	control
6	ASEL	control
6	ASEL	control
12	ASEL	control
5	ASEL	control
5	ASEL	control
10	ASEL	control
6	ASEL	control
4	ASEL	control
11	ASEL	control
7	ASEL	control
7	ASEL	control
6	ASEL	control
