# Supplementary material for: Mechanism of life-long maintenance of neuron identity despite molecular fluctuations
Source: eLife journal article supplement (doi:10.7554/elife.66955), 2021-12-15
Supplement: fig3-data1 [file Figure 3-Source data.xlsx]

## Sheet: Fig 3B
hs1	hs2	hs3	hs4	control		Heatshock experiments
19	19	4	4	3		hsp16-41p::che-1
21	9	5	3	5		started 10 min after heatshock (hs1)
27	8	8	3	6		then every 17 minutes, 3 times
24	19	7	7	2
25	14	6	2	5
26	12	12	4	8
31	14	11	2	5
24	11	6	0	3
20	16	9	4	5
29	10	7	5	7
28	19	5	7	9
26	11	10	10	4
20	9	7	2	2
19	12	12	8	5
	24	3	2
	11	6	4
	14	14	3
	16	10	4
	18	16	3
	18	6	8
	10	5	4
	17	2	4
	13		3
	16		4
			9
			5
			3
			4
			9

## Sheet: Fig 3D
w3	time	0	20	60	100	140	180	240								before FRAP
	intensity	187	254	504	903	1003	1225	1281								1107
w4	time	0	37	77	117											before FRAP
	intensity	252	608	926	1213											1129
w5	time	0	18	33	48	78	98	118	138	178	198					before FRAP
	intensity	251	392	417	514	725	739	876	972	1033	1085					1010
w6	time	0	15	30	45	60	75	95	105	120	135	150				before FRAP
	intensity	252	399	463	548	658	753	815	973	1173	1036	1107				1175
w7	time	0	12	27	42	57	72	87	102	117	132	147				before FRAP
	intensity	257	411	580	681	779	897	925	994	1134	1110	1188				945
w8	time	0	11	26	41	56	71	86	101	116	131	146	161	176	181	before FRAP
	intensity	287	454	624	756	946	1168	1174	1253	1311	1401	1431	1466	1539	1620	1763
