# Supplementary material for: Mechanism of life-long maintenance of neuron identity despite molecular fluctuations
Source: eLife journal article supplement (doi:10.7554/elife.66955), 2021-12-15
Supplement: fig6-data1 [file Figure 6B-Source data.xlsx]

## Sheet: Fig 6B
	chemotaxis index						mean	s.e.m.
Wild type	0.964286	0.954887	0.910448	0.878049	0.956989	0.948276	0.935489	0.0138537
che-1(p679)	0.119266	-0.0352941	0.163636	-0.0689655			0.0446607	0.0570269
(ASEgcy-22)p::che-1::GFP::AID	0.97561	0.972603	0.97561	0.877551			0.950343	0.0242744
(ASEche-1)p::gcy-22	0.98	0.923077	0.911504	0.975			0.947395	0.0175704
(ASEgcy-22+flanks)p::che-1::GFP::AID	0.0166667	-0.387097	-0.0769231	0.206897	-0.264368	-0.282051	-0.131146	0.0903867
(ASEche-1+flanks)p::gcy-22	0.974684	0.954545	0.957895	0.931034	0.93007	0.888889	0.93952	0.012281
