# Supplementary material for: Mechanism of life-long maintenance of neuron identity despite molecular fluctuations
Source: eLife journal article supplement (doi:10.7554/elife.66955), 2021-12-15
Supplement: fig6-data1 [file Figure 6F-Source data.xlsx]

## Sheet: gcy22_che1flank_con
gcy-22 with che-1 ASE prom motif
batch 1	worm 1	31
batch 1	worm 2	28
batch 1	worm 4	36
batch 1	worm 5	26
batch 1	worm 6	25
batch 1	worm 7	23
batch 1	worm 8	26
batch 1	worm 9	23
batch 1	worm 10	17
batch 1	worm 11	22
batch 1	worm 12	28
batch 1	worm 14	31

## Sheet: gcy22_che1flank_aux
gcy-22 with che-1 ASE prom motif					ASE che-1 flank
batch 1	worm 1	22	0		auxin 1mM
batch 1	worm 2	18	2
batch 1	worm 3	7	0
batch 1	worm 4	24	1
batch 1	worm 5	15	1
batch 2	worm 1	21	0
batch 2	worm 2	5	3
batch 2	worm 3	6	3
batch 2	worm 4	16	3
batch 2	worm 5	5	3
batch 2	worm 6	26	1
batch 2	worm 7	17	1
batch 2	worm 8	7	2
batch 3	worm 1	34	0
batch 3	worm 2	3	1
batch 3	worm 3	20	3
batch 3	worm 4	26	0
batch 3	worm 5	27	4
batch 3	worm 6	30	2
batch 1	worm 1	22	0
batch 1	worm 2	26	0
batch 1	worm 3	6	2
batch 1	worm 4	10	0
batch 1	worm 5	16	0
batch 1	worm 6	23	1
batch 1	worm 7	16	0
batch 1	worm 8	17	0
batch 2	worm 1	18	0
batch 2	worm 3	15	0
batch 2	worm 4	26	0

## Sheet: gcy22_che1bp_con
gcy-22 with che-1 ASE motif				ASE gcy-22 bp
batch 1	worm 1	28		control
batch 1	worm 2	33
batch 1	worm 3	23
batch 1	worm 4	34
batch 1	worm 6	18
batch 1	worm 7	23
batch 1	worm 8	24
batch 1	worm 9	25
batch 1	worm 10	24
batch 1	worm 11	26
batch 1	worm 12	28
batch 2	worm 1	38
batch 2	worm 2	26
batch 2	worm 3	28
batch 2	worm 4	30
batch 2	worm 5	31
batch 2	worm 6	20
batch 2	worm 7	24
batch 2	worm 8	29
batch 2	worm 9	28
batch 2	worm 10	32
batch 2	worm 11	30

## Sheet: gcy22_che1bp_aux
gcy-22 with che-1 ASE motif				ASE gcy-22 bp
batch 1	worm 1	8		auxin 1mM
batch 1	worm 2	3
batch 1	worm 3	1
batch 1	worm 4	5
batch 1	worm 5	3
batch 1	worm 6	3
batch 1	worm 7	2
batch 1	worm 8	0
batch 1	worm 9	2
batch 1	worm 10	2
batch 1	worm 1	1
batch 1	worm 2	2
batch 1	worm 3	3
batch 1	worm 4	4
batch 1	worm 5	3
batch 1	worm 6	1
batch 1	worm 7	2
batch 1	worm 8	0
bacth 1	worm 9	2
batch 1	worm 10	3
batch 1	worm 11	0

## Sheet: ASEche1bp_con
che-1 R	gcy-22		ASE che-1 bp
7	20		control
4	21
5	30
7	23
8	25
6	20
	32
7	25
6	31
5	28
8	25
10	34
	32
4	20
9	29

## Sheet: degron_l3l4_con
che-1::GFP::AID	L3/L4	che-1 R	che-1 L	gcy-22		che-1::GFP::AID
batch 1	worm 2	4	8	20
	worm 3	11	7	26
	worm 5	12	11	23
	worm 6	7	6	22
	worm 7	10	7
	worm 8	5	3
	worm 9	12	7	23
	worm 10	9	7	27
	worm 11	13	5	25
	worm 12	15	7	30
	worm 13	17	4
	worm 14	8	2
batch 2	worm 2			26
	worm 4			27
	worm 5			23
	worm 7			26
	worm 10			32
	worm 12			28

## Sheet: degron_l3l4_aux
gcy-22 aux l3		From combined experiments
0		Overview
1		che-1::GFP::AID
0		On auxin 24 hours
0
2
3
1
6
7
10
