# Supplementary material for: Mechanism of life-long maintenance of neuron identity despite molecular fluctuations
Source: eLife journal article supplement (doi:10.7554/elife.66955), 2021-12-15
Supplement: fig6-data1 [file Figure S5A-Source data.xlsx]

## Sheet: Fig S5A
ASEche-1 - control	che-1 R (ASEche1)	gcy-22 (ASEche1)		ASEgcy22 - control		gcy-22 (ASEgcy22)
batch 1	7	20		batch 1	worm 1	28
batch 1	4	21		batch 1	worm 2	33
batch 1	5	30		batch 1	worm 3	23
batch 1	7	23		batch 1	worm 4	34
batch 1	8	25		batch 1	worm 6	18
batch 1	6	20		batch 1	worm 7	23
batch 1		32		batch 1	worm 8	24
batch 1	7	25		batch 1	worm 9	25
batch 1	6	31		batch 1	worm 10	24
batch 1	5	28		batch 1	worm 11	26
batch 1	8	25		batch 1	worm 12	28
batch 1	10	34		batch 2	worm 1	38
batch 1		32		batch 2	worm 2	26
batch 1	4	20		batch 2	worm 3	28
batch 1	9	29		batch 2	worm 4	30
				batch 2	worm 5	31
				batch 2	worm 6	20
				batch 2	worm 7	24
				batch 2	worm 8	29
				batch 2	worm 9	28
				batch 2	worm 10	32
				batch 2	worm 11	30
