# Supplementary material for: Mechanism of life-long maintenance of neuron identity despite molecular fluctuations
Source: eLife journal article supplement (doi:10.7554/elife.66955), 2021-12-15
Supplement: fig6-data1 [file Figure S5C-Source data.xlsx]

## Sheet: embryo_che-1
time	che-1		N2 data
300	0
300	0
360	29
360	31
360	31
360	26
360	15
360	18
360	19
360	22
360	33
360	31
360	27
360	24
360	27
360	35
430	9
430	6
430	9
430	11
430	9
430	3
430	6
430	5
430	15
430	10
430	16
490	4
490	10
490	5
490	3
490	8
490	10
490	4
490	7
550	7
550	5
550	3
550	6
550	9
550	4
550	8
550	4
550	8
550	3
550	10
550	6
550	1
550	4
550	9
550	8
550	12
550	5
550	11
610	10
610	9
610	3
610	3
610	2
610	5
610	5
610	7
610	3
610	8
610	6
610	10
610	7
610	5
610	7
610	11
610	7
610	5

## Sheet: embryo_gcy22
time	gcy-22		N2 data
300	0
360	0
360	0
430	3
430	9
430	5
430	1
490	12
490	13
490	10
550	15
550	11
550	16
550	13
550	13
550	9
550	7
550	8
610	20
610	22
610	18
610	26
610	19
610	24
610	21
610	19
610	23

## Sheet: che1_mutflank_360
time	che-1		mutant flanks gcy-22
360	26		bean stage embryo
360	30
360	33
360	22
360	32
360	23
360	32
360	12
360	28
360	23

## Sheet: che1_asemotifswap_360
time	che-1		mutant flanks gcy-22
360	28		bean stage embryo
360	27
360	36
360	32
360	34
360	24
360	17
360	25
