# Supplementary material for: Mechanism of life-long maintenance of neuron identity despite molecular fluctuations
Source: eLife journal article supplement (doi:10.7554/elife.66955), 2021-12-15
Supplement: fig7-data1 [file Figure 7-Source data.xlsx]

## Sheet: Fig 7B
	chemotaxis index						mean	s.e.m.
Wild type	0.964286	0.954887	0.84058	0.919192	0.956989	0.948276	0.930702	0.0191199
che-1::GFP::AID	0.96875	1	0.925926	0.97561			0.967571	0.0154163
che-1(p679)	0.119266	-0.0352941	-0.0909091	-0.0746269			-0.020391	0.0479935
(∆HD)p::che-1::GFP::AID	0.451327	0.555556	0.565217	0.496063			0.517041	0.0267125

## Sheet: Fig 7C
Scored timelapse + indv worms from eGFP data ("multiphoton" microscope)
ASEL	embryo	L1/L2	L3/L4	YA
recovered	24	13	3	2
total	24	36	14	18
ASER	embryo	L1/L2	L3/L4	YA
recovered	24	29	9	9
total	24	36	16	20

## Sheet: Fig 7D
batch	worm	stage	che-1	gcy-22
1	worm_5	L1	1
1	worm_5	L1	0
1	worm_6	L1	1
1	worm_6	L1	0
1	worm_7	L1	2
1	worm_7	L1	0
1	worm_8	comma	15
1	worm_8	twitching	4
1	worm_10	L1	2
1	worm_11	twitching	7
1	worm_11	twitching	10
2	worm_1	1.5 fold	5
2	worm_1	comma	12
2	worm_1	twitching	5
2	worm_2	2 fold	11
2	worm_2	comma	16
2	worm_2	bean	28	0
2	worm_2	bean	35	0
2	worm_3	bean	24	0
2	worm_3	bean	27	0
2	worm_4	twitching	6
2	worm_4	bean	36	0
2	worm_4	twitching	7
2	worm_5	twitching	11
2	worm_5	twitching	8
2	worm_6	twitching	5
2	worm_9	bean	29
2	worm_9	L1	1
2	worm_9	L1	3
1	worm_2	3 fold		14
1	worm_4	3 fold		21
1	worm_12	L1		6
1	worm_13	L1		2
1	worm_23	L1		5
1	worm_24	L1		1
1	worm_25	L1		2
1	worm_26	L1		2
2	worm_1	L1		3
2	worm_6	L1		5
2	worm_8	L1		10
3	worm_1	bean	35
3	worm_1	bean	34
3	worm_1	twitching	12
3	worm_1	twitching	7	10
3	worm_1	twitching	7
3	worm_1	twitching	6	2
3	worm_1	twitching	8
3	worm_1	twitching	9	25
3	worm_2	twitching	11
3	worm_2	twitching	13	26
3	worm_2	twitching	10
3	worm_2	twitching	9	24
3	worm_2	bean	16	0
3	worm_2	bean	17	0
3	worm_3	twitching	9
3	worm_3	twitching	8	17
3	worm_3	twitching	8
3	worm_3	twitching	7	24
3	worm_3	1.5 fold	16
3	worm_3	1.5 fold	17	2
3	worm_4	twitching	12
3	worm_4	twitching	8	19
3	worm_4	twitching	12	27
3	worm_4	twitching	5
3	worm_9	twitching		24
3	worm_14	twitching		22
3	worm_16	twitching		16
4	worm_2	twitching		17
4	worm_3	twitching		10
4	worm_6	twitching		20
4		twitching		19
