# Supplementary material for: Mechanism of life-long maintenance of neuron identity despite molecular fluctuations
Source: eLife journal article supplement (doi:10.7554/elife.66955), 2021-12-15
Supplement: fig7-data1 [file Figure 7E-Source data.xlsx]

## Sheet: HD_del_newH1
newH1	HD deletion che-1 promoter
time point	ASER	bg1	ASER int	ASER time	ASEL	bg 2	ASEL int	ASEL time	stage
15	1058	1015	43	0	1038	911	127	0
17	1120	935	185	40
19	1160	989	171	80	1055	1001	54	80
21	898	778	120	120			0	120
23	764	705	59	160
25	1153	958	195	200			0	200
27	1111	961	150	240
29	903	823	80	280			0	280
31	1099	996	103	320			0	320
33	617	574	43	360			0	360
35	743	648	95	400			0	400
37	756	716	40	440			0	440
39	937	836	101	480			0	480
41	890	790	100	520			0	520
43	596	529	67	560			0	560
45
47	502	477	25	640
48	489	440	49	660
51
54	782	761	21	780
55	658	586	72	800					M1
57	617	590	27	840
59	945	851	94	880
61	671	650	21	920
63	594	559	35	960
65	920	891	29	1000
67	645	611	34	1040
69	727	602	125	1080
71	933	841	92	1120
73	611	538	73	1160
75	673	633	40	1200
77	1010	937	73	1240
79	980	929	51	1280
81	715	651	64	1320					M2
83	611	548	63	1360
85	769	751	18	1400
87
89	772	717	55	1480
91	632	555	77	1520
93
95
97	747	715	32	1640
99	0		0	1680
101	0		0	1720
103	0		0	1760
105	0		0	1800					M3

## Sheet: HD_del_newH4
newH4	HD deletion che-1 promoter
time point	ASER	bg1	ASER int	ASER time	ASEL	bg 2	ASEL int	ASEL time
17	941	826	115	0	887	822	65	0
19	1070	983	87	40	959	894	65	40
21	838	729	109	80	831	744	87	80
23	861	728	133	120	789	718	71	120
25	984	898	86	160	967	870	97	160
27	790	697	93	200	743	712	31	200
29	674	620	54	240
31	982	856	126	280	899	842	57	280
33	1129	950	179	320	OFF		0	320
35	925	820	105	360	OFF		0	360
37	1011	905	106	400	OFF		0	400
39	880	806	74	440			0	440
41	984	871	113	480			0	480
43	704	658	46	520			0	520
45	830	759	71	560			0	560
47	982	916	66	600			0	600
49	962	871	91	640			0	640
51	606	569	37	680			0	680
53	971	901	70	720			0	720
55	965	849	116	760			0	760
57	893	757	136	800			0	800
59	1000	778	222	840			0	840
61	748	671	77	880			0	880
63	988	918	70	920			0	920
65
67
69
71	969	890	79	1080			0	1080
73
75
77	637	535	102	1200			0	1200
79
81
83	725	677	48	1320			0	1320
85
87
89	660	593	67	1440			0	1440
91
93
95	975	863	112	1560			0	1560
97
99
101	976	861	115	1680			0	1680
103
105
107	589	503	86	1800			0	1800
109
111
113	553	494	59	1920			0	1920
115
117
119	596	549	47	2040			0	2040
121
123
125	774	692	82	2160			0	2160
127
129
131	7645	7543	102	2280			0	2280
133
135
137	660	538	122	2400			0	2400
139
141
143	879	758	121	2520			0	2520

## Sheet: HD_del_newI2
newI2	HD deletion che-1 promoter
time point	ASER	bg1	ASER int	ASEL	bg 2	time min
10	1249	1076	173			0
12	866	703	163			40
14	1182	987	195			80
16	654	604	50			120
18	678	602	76			160
20	845	770	75			200
22	759	690	69			240
24	778	748	30			280
26	679	653	26			320
28	646	559	87			360
30	944	895	49			400
32	809	754	55			440
34	OFF		0			480
36	OFF		0			520
38	OFF		0			560
40	OFF		0			600
