# Supplementary material for: Mechanism of life-long maintenance of neuron identity despite molecular fluctuations
Source: eLife journal article supplement (doi:10.7554/elife.66955), 2021-12-15
Supplement: fig7-data1 [file Figure S6-Source data.xlsx]

## Sheet: Fig S6B
Strain:che-1::GFP::AID	ASE intensity	background	volume		Strain:che-1::GFP	CHE-1 protein quantification			Strain:HD mutant	Intensity	background	volume
w1	2975	810	4.83636			460			w1	212	44	3.5
w2	3144	811	4.90909			563			w2	608	47	3.5
w3	3360	1103	2.71818			732			w3	347	37	3.5
w4	1917	483	3.10909			840			w4	198	26	4
w5	2484	395	2.86364			1044			w5	484		4
w6	2192	366	2.18182			1130			w6	523	79	4.2
w7	2921	391	4			1655			w7	294	33	4
w8	2980	460	4.83636		(from previous experiment fig2)				w8	321	18	5
w9	2308	215	4.4						w9	259	36	4.4
w10	1375	207	4.90909
w12	2732	392	3.40909
w13	2550	370	4.72727
w14	2234	347	5.4
w15	1579	307	3
w17	2091	268	4.83636
w18	2395	402	4.32727

## Sheet: Fig S6C
Strain:ceh-36					Strain:HDmut che-1::GFP::AID
age	ASEL/ASER	total	# expressing CHE-1::GFP		age	ASEL/ASER	total	# expressing CHE-1::GFP
L1/L2	ASER	11	11		L1/L2	ASER	36	29
L1/L2	ASEL	11	11		L1/L2	ASEL	36	14
L3/L4	ASER	17	17		L3/L4	ASER	36	20
L3/L4	ASEL	17	17		L3/L4	ASEL	32	6

## Sheet: Fig S6D
	chemotaxis index						mean	s.e.m.
wild type	0.952381	0.974522	0.964912	0.899441			0.947814	0.0145053
che-1(p679)	0.196429	0.111111	0.0707071	0			0.0945617	0.035498
ceh-36(ks86)	0.384615	0.36	0.606299	0.578947	0.445378	0.447619	0.470477	0.0376177
ceh-16(gj2127)	-0.339623	-0.490196	-0.445378	-0.703704	-0.685393	-0.564626	-0.538153	0.0527333
