# Supplementary material for: Mechanism of life-long maintenance of neuron identity despite molecular fluctuations
Source: eLife journal article supplement (doi:10.7554/elife.66955), 2021-12-15
Supplement: fig7-data1 [file Figure S6E-Source data.xlsx]

## Sheet: NewS0
Image	Time	ASEL	ASEL background	ASER	ASER background	Body length	Event		boven is slice 1
17	0	1491	1370	1599	1476	1390	hatch		strain: che-1::GFP::AID
18	20								OP50
19	40	920	817	968	798	1476			large chambers
20	60								room temp
21	80	1115	1076	1210	1041	1544
22	100
23	120	1147	1016	1169	994	1594
24	140
25	160	1085	952	1050	908	1621
26	180
27	200	1292	1153	1264	1100	1757
28	220
29	240	1122	1064	1305	1122
30	260
31	280	873	706	846	635
32	300
33	320	1008	889	1098	898
34	340
35	360	791	662	791	588
36	380
37	400	768	680	779	650
38	420
39	440	776	627	737	647
40	460
41	480	1444	1316	1507	1364
42	500
43	520	1316	1004	1100	938
44	540
45	560	1289	1102	1396	1143
46	580
47	600
48	620	1037	844	1047	871
49	640	922	833	888	772
50	660
51	680	906	811	986	844
52	700
53	720	998	894	1060	891
54	740
55	760	886	783	935	771
56	780
57	800	1176	1057	1235	1048
58	820
59	840	804	682	801	630
60	860
61	880	1032	897	1140	799
62	900
63	920	860	761	824	707
64	940
65	960	932	818	942	785
66	980
67	1000	1067	921	1096	893
68	1020
69	1040	955	915	1012	902
70	1060
71	1080	553	471	522	457
72	1100
73	1120	853	745	828	739
74	1140
75	1160	728	623	772	613
76	1180
77	1200	822	741	942	725
78	1220
79	1240	1101	905	1115	893
80	1260
81	1280	595	549	639	506
82	1300
83	1320	902	736	990	690
84	1340
85	1360	886	768	943	743
86	1380
87	1400	680	597	708	601
88	1420
89	1440	746	716	862	659
90	1460
91	1480	953	766	927	765
92	1500
93	1520	565	486	564	451
94	1540
95	1560	893	646	831	671
96	1580
97	1600	684	568	810	683
98	1620
99	1640	779	637	683	796
100	1660
101	1680	711	561	796	675
102	1700
103	1720	602	526	696	562
104	1740
105	1760	548	435	548	413
106	1780
107	1800	569	496	608	521
108	1820
109	1840	737	666	809	642
110	1860
111	1880	492	402	548	441
112	1900
113	1920	604	507	678	562
114	1940
115	1960	716	585	692	561
116	1980
117	2000	656	535	754	584
118	2020
119	2040	743	587	857	649
120	2060
121	2080	705	629	647	568
122	2100
123	2120	789	632	943	726
124	2140
125	2160	537	452	619	455
126	2180
127	2200	675	561	810	628
128	2220
129	2240	572	519	561	518
130	2260
131	2280	780	689	738	601
132	2300
133	2320	623	531	579	492
134	2340
135	2360
136	2380
137	2400
138	2420
139	2440
140	2460
141	2480
142	2500
143	2520
144	2540
145	2560
146	2580
147	2600
148	2620
149	2640
150	2660

## Sheet: NewS8
Image	Time	ASEL	ASEL background	ASER	ASER background	Body length	Event		boven is slice 1
22	0	793	625	796	605		H		strain: che-1::GFP::AID
23	20								OP50
24	40	859	781	897	757				large chambers
25	60								room temp
26	80	1305	1172	1500	1199
27	100
28	120	916	822	977	827
29	140
30	160	1336	1140	1350	1147
31	180
32	200	1184	1026	1211	989
33	220
34	240	738	623	752	635
35	260
36	280	1079	960	1166	1011
37	300
38	320	1018	801	939	838
39	340
40	360	850	748	932	693
41	380
42	400	1020	801	1024	827
43	420
44	440	1045	935	1119	958
45	460
46	480	544	506	556	493
47	500
48	520	1038	859	1054	851
49	540
50	560	928	840	928	730
51	580
52	600	911	829	990	798
53	620
54	640	999	855	983	838
55	660
56	680	712	600	702	583
57	700
58	720	774	695	880	704
59	740
60	760	942	814	935	829
61	780
62	800	859	650	884	712
63	820
64	840	928	771	946	771
65	860
66	880	772	605	741	593
67	900
68	920	829	654	909	697
69	940
70	960	559	430	578	414
71	980
72	1000	789	656	741	625
73	1020
74	1040	730	628	802	595
75	1060
76	1080	710	642	765	585
77	1100
78	1120	689	550	656	522
79	1140
80	1160	580	504	624	508
81	1180
82	1200	714	550	682	595
83	1220
84	1240	832	586	773	551
85	1260
86	1280	536	382	536	405
87	1300
88	1320	537	409	536	442
89	1340
90	1360	726	596	776	629
91	1380
92	1400	446	373	457	376
93	1420
94	1440	767	629	712	563
95	1460
96	1480
97	1500	689	585	728	585
98	1520	656	548	705	581
99	1540
100	1560	614	539	688	539
101	1580
102	1600	681	569	958	600
103	1620
104	1640	678	557	765	591
105	1660
106	1680	553	472	617	442
107	1700
108	1720	460	383	443	363
109	1740
110	1760	428	346	472	337
111	1780
112	1800
113	1820
114	1840
115	1860
116	1880
117	1900
118	1920
119	1940
120	1960	707	563	810	649
121	1980
122	2000	407	359	461	352
123	2020
124	2040	549	476	610	502
125	2060
126	2080	564	477	594	424
127	2100
128	2120	492	444	525	448
129	2140
130	2160	741	617	708	574
131	2180
132	2200	613	499	695	572
133	2220
134	2240	470	384	471	378
135	2260
136	2280	487	374	509	438
137	2300
138	2320	724	596	678	530
139	2340
140	2360	660	560	629	527
141	2380
142	2400	521	410	497	386
143	2420
144	2440	744	590	803	635
145	2460
146	2480	790	667	757	588
147	2500
148	2520	716	585	838	663
149	2540
150	2560
151	2580

## Sheet: NewT3
Image	Time	ASEL	ASEL background	ASER	ASER background	Body length	Event		boven is slice 1
18	0	1404	1263	1535	1263				strain: che-1::GFP::AID
19	20								OP50
20	40	1408	1236	1550	1257				large chambers
21	60								room temp
22	80	702	646	771	546
23	100
24	120	1357	1204	1489	1217
25	140
26	160	1104	1030	1251	915
27	180
28	200			872	689
29	220
30	240	1166	1038	1370	1023
31	260
32	280	897	762	1015	760
33	300
34	320	897	605	854	654
35	340
36	360	955	845	1056	839
37	380
38	400	991	757	971	805
39	420
40	440	1169	976	1160	985
41	460
42	480	544	449	565	494
43	500
44	520	1060	937	1060	862
45	540
46	560	975	862	1000	826
47	580
48	600	1098	911	1065	866
49	620
50	640	756	656	814	705
51	660
52	680	1150	1023	1143	963
53	700
54	720	1044	924	993	826
55	740
56	760	1145	967	1316	978
57	780
58	800	714	593	724	661
59	820
60	840	829	750	891	697
61	860
62	880	921	744	884	749
63	900
64	920			634	514
65	940
66	960	524	459	499	426
67	980
68	1000	531	487	557	496
69	1020
70	1040	873	702	853	696
71	1060
72	1080	546	484	548	450
73	1100
74	1120	743	624	779	626
75	1140
76	1160	703	572	695	558
77	1180
78	1200	832	736	970	679
79	1220
80	1240	502	441	553	486
81	1260
82	1280	789	604	927	614
83	1300
84	1320	869	673	855	664
85	1340
86	1360	486	432	498	436
87	1380
88	1400	502	402	498	396
89	1420
90	1440	652	532	762	558
91	1460
92	1480	650	537	752	548
93	1500
94	1520	503	438	609	450
95	1540
96	1560	771	694	814	631
97	1580
98	1600	758	617	866	604
99	1620
100	1640	463	428	472	411
101	1660
102	1680	529	481	570	471
103	1700
104	1720	559	464	539	471
105	1740
106	1760	661	559	787	554
107	1780
108	1800	603	476
109	1820
110	1840	551	441	544	447
111	1860
112	1880	568	459	573	451
113	1900
114	1920	468	387	504	418
115	1940
116	1960			464	419
117	1980
118	2000	490	415	492	415
119	2020
120	2040	495	373	531	385
121	2060
122	2080	592	475	600	455
123	2100
124	2120	502	446	480	402
125	2140
126	2160	580	475	637	497
127	2180
128	2200	532	475	568	386
129	2220
130	2240	726	561	908	626
131	2260
132	2280	471	377	520	404
133	2300
134	2320	425	386	536	369
135	2340
136	2360	714	594	781	640
137	2380
138	2400	472	324
139	2420
140	2440	629	565	728	512
141	2460
142	2480	509	378
143	2500
144	2520
